- 1 Knowledge, attitude and practice toward COVID-19 among
- 2 healthcare workers in public health facilities, Eastern Ethiopia.
- 3 Alinoor Mohamed Farah<sup>1</sup>
- 4 Email: [alinuriana@yahoo.com](mailto:alinuriana@yahoo.com)
- 5 Tahir Yousuf Nour<sup>1</sup>
- 6 Email: [daahir571@gmail.com](mailto:daahir571@gmail.com)
- 7 Muse Obsiye
- 8 Email: [museibnuobsiye22@gmail.com](mailto:museibnuobsiye22@gmail.com)
- 9 Mowlid Aqil Adan<sup>1</sup>
- 10 Email: [mowlidakil@gmail.com](mailto:mowlidakil@gmail.com)
- 11 Omar Moeline Ali<sup>1</sup>
- 12 Email: [yaanyo571@gmail.com](mailto:yaanyo571@gmail.com)
- 13 Muktar Arab Hussein<sup>1</sup>
- 14 Email: [muktararab59@gmail.com](mailto:muktararab59@gmail.com)
- 15 Abdullahi Bedel Budul<sup>1</sup>
- 16 Email: [abdulahi.bbh@gmail.com](mailto:abdulahi.bbh@gmail.com)
- 17 Muktar Omer<sup>1</sup>
- 18 Email: [muktaomer82@gmail.com](mailto:muktaomer82@gmail.com)
- 19 Fentabil Getnet<sup>1</sup>
- 20 Email: [b.infen4ever@gmail.com](mailto:b.infen4ever@gmail.com)
- 21 Authors' Information:
- 22 \*<sup>1</sup>Corresponding Author
- 23 \*<sup>1</sup>Correspondence and reprint requests should be addressed to:
- 24 Alinoor Mohamed Farah
- 25 College of Medicine and Health Sciences,
- 26 Jigjiga University, Jigjiga, Ethiopia
- 27 Lecturer at Jigjiga University
- 28 Phone: +251911053913
- 29 Email: [alinuriana@yahoo.com](mailto:alinuriana@yahoo.com)
- 30 <sup>1</sup> Department of Public Health, College of Medicine and Health
- 31 Sciences, Jigjiga University, Ethiopia

32 **Abstract**

33 On 13 March 2020, Ethiopia reported the first confirmed case of  
34 COVID-19 in Addis Ababa. COVID-19 is likely to overwhelm an  
35 already fragile health- care delivery system and reduce the  
36 availability of services for endemic health concerns such as  
37 malaria and diarrheal diseases.

38 Cross sectional study was conducted on health care workers in  
39 three public health facilities in Somali region to assess knowledge,  
40 attitude and practice towards COVID-19. T-test and ANOVA were  
41 used to analyze the relationship between the dependent, and  
42 independent variables. Spearman's correlation was used to assess  
43 the relationship between mean knowledge and attitude scores.

44 A vast majority of the participants were male (n = 293, 67.5%),  
45 with a mean age of 27.6 (SD: 5.3) years. The mean knowledge  
46 score was 13.7 (SD: 2.6) and the mean attitude score 10.5 (SD:  
47 4.1). Only 45.2 % (n = 196) of the participants had a good attitude  
48 toward COVID-19. There was a negative correlation between  
49 knowledge scores, attitude scores ( $r=-0.295$ ,  $P<0.001$ ) and practice  
50 ( $r=-0.298$ ,  $P<0.001$ ).

51 The overall level of knowledge was good. However, the attitude  
52 and practice were relatively low. We recommend strategies for  
53 enhancing the capacity of healthcare workers to develop positive  
54 attitude and practice.

55 **Key words:** covid-19, knowledge, attitude, practice, health care  
56 workers, Eastern Ethiopia

57

58

59

## 60 **Background**

61 A cluster of pneumonia cases in Wuhan, China, was reported to the  
62 World Health Organization (WHO) on 31 December 2019. The  
63 cause of the pneumonia cases was identified as the 2019 novel  
64 coronavirus. On 30 January 2020, in response to this serious  
65 situation, the World Health Organization (WHO) declared it a  
66 public health emergency of international concern on January 30  
67 and called for collaborative efforts of all countries to prevent the  
68 rapid spread of COVID-19 (Organization, 2005) and on 11 March  
69 2020, declared COVID-19 a pandemic(Organization, 2020d). In a  
70 period of just 11 weeks from January to mid-March 2020, COVID-  
71 19 has spread rapidly from its epicenter in Wuhan City to the rest  
72 of the world. At the time of writing of current work, there are more  
73 than 25 million confirmed covid-19 cases globally and almost  
74 950,000 associated deaths(Organization, 2020b).

75 COVID-19 is highly infectious, and its main clinical symptoms  
76 include fever, dry cough, fatigue, myalgia, and dyspnea. The most  
77 commonly reported symptoms are fever, cough, myalgia or  
78 fatigue, pneumonia, and complicated dyspnea, whereas less  
79 common reported symptoms include headache, diarrhea,  
80 hemoptysis, runny nose, and phlegm-producing cough(Chen et al.,  
81 2020; Control & Prevention, 2019; Huang et al., 2020; Novel,  
82 2020). Fatality rate was higher among middle-aged and elderly  
83 patients with pre-existing medical condition (tumor surgery,  
84 cirrhosis, hypertension, coronary heart disease, diabetes, and  
85 Parkinson's disease). The virus is also affecting the health of  
86 younger adults(Li et al., 2020).

87 The pandemic is adding to the burden of endemic infectious  
88 diseases that prevail in many countries with an ongoing  
89 humanitarian response, such as cholera, measles, malaria, HIV and

90 tuberculosis. Pre-existing poor hygiene practices, poor coverage in  
91 water and sanitation services and overcrowded living conditions  
92 also augment the incidence and spread of contamination by the  
93 virus.

94 Ethiopia reported the first confirmed case of COVID-19 in Addis  
95 Ababa on 15 March 2020. As of 3rd of August, there were a total  
96 of 18,706 COVID-19 confirmed cases and 310 associated deaths. In  
97 Somali region, the first case was identified on 24 of April 2020 and  
98 as of 3rd of August, a total of 704 cases were identified with 18  
99 associated deaths. There are already a limited number of health  
100 workers in the country and in particular Somali region, putting  
101 extreme strain on capacity to serve patients, especially for non-  
102 emergency care (EPHI, 2020).

103 Thus, COVID-19 is likely to overwhelm an already fragile health-  
104 care delivery system and reduce the availability of services for  
105 endemic health concerns such as malaria and diarrheal diseases  
106 including cholera (Poole et al., 2020). Ethiopia's safe water supply  
107 is 30 per cent, serving as the leading cause of communicable  
108 diseases in the country.

109 To date, no specific antiviral treatment has been confirmed to be  
110 effective against COVID-19, and there is no vaccine so far  
111 (Cascella et al., 2020). Regarding infected patients with COVID-  
112 19, it has been recommended to apply appropriate symptomatic  
113 treatment and supportive care (Control & Prevention, 2019; Huang  
114 et al., 2020). Therefore, applying preventive measures to reduce  
115 the spread of disease is of utmost importance.

116 In this regard, airborne precautions and other protective measures  
117 have been discussed and proposed for prevention. Recommended  
118 preventive measures include regular hand washing with soap,  
119 social/physical distancing, and respiratory hygiene (covering

120 mouth and nose while coughing or sneezing) (Control &  
121 Prevention, 2019; Organization, 2020c).

122 The WHO also issued guidelines on the use of face masks in  
123 different settings including in the community, home based care,  
124 and in the health care settings of COVID-19(Organization, 2020a).  
125 In this guideline, health care workers are recommended to use  
126 facemask such as those certified N95 when performing aerosol-  
127 generating procedures and to use medical masks when providing  
128 care to suspected or confirmed COVID-19 cases. However, these  
129 effective prevention and control practices depends on awareness  
130 and compliance among health workers at all levels.

131 A poor level of knowledge has been implicated in the rapid spread  
132 of the infection in health facilities (McCloskey & Heymann,  
133 2020; Selvaraj et al., 2018) and delay of treatment(Hoffman &  
134 Silverberg, 2018), and may put patients' lives at risk. Therefore,  
135 this study is aimed to investigate the knowledge, attitude and  
136 practice of health workers towards COVID-19 infection. The  
137 findings may be useful in recommending any remedial measures  
138 and additional interventions in the study area to improve  
139 awareness, attitude and practice among health care workers.

140

141

142

143

144

145

146

147

## 148 **Method and materials**

### 149 **Study design, setting and period**

150 An institution based cross-sectional study conducted from June to  
151 August 2020 at one public hospital and two health centers in  
152 Jigjiga town. The referral hospital is a multidisciplinary specialized  
153 teaching hospital with 351 inpatient beds and the other one is  
154 district hospital with 193 inpatient beds. Currently, it provides  
155 health services to more than one million inhabitants in its  
156 catchment area. During data collection, Karamada hospital which  
157 one of the facilities selected, was turned into covid-19 treatment  
158 center and was not accessible. Most of their staff were reassigned  
159 to other health faculties to support the provision of basic health  
160 services.

### 161 **Sample size determination**

162 Employees that were invited to participate in this study were all  
163 health care workers employed by the public health facilities in  
164 Jigjiga city council, Somali region of Ethiopia. 686 respondents  
165 believed to have patient care or specimen contact such as  
166 physicians, nurses, midwives, health officers, laboratory  
167 professions, x-ray professionals, pharmacists/druggists,  
168 anesthetists and biomedical professionals.

### 169 **Sampling technique**

170 All public health facilities in Jigjiga city council of Somali region  
171 were identified and all health facilities were selected. The sample  
172 size of 686 was allocated to each facility proportional to the size of  
173 health professionals who were working during data collection. The  
174 health professionals were stratified by their professions in each

175 selected facility and all health workers were selected from each  
176 stratum.

### 177 **Inclusion and exclusion criteria**

178 Only full-time employee (health care workers) who are potentially  
179 at high-risk (physicians, medical laboratory technologists, nurses,  
180 and midwives), available during the data collection period and who  
181 are ready to take part in the study were included.

### 182 **Data collection and quality control**

183 A structured self-administered questionnaire was used to collect  
184 the data. The questionnaire was designed as per Ahmed M. Asaad'  
185 study towards the Middle East Respiratory Syndrome Coronavirus  
186 (MERs CoV) and also adapted from the current interim guidance  
187 and information for healthcare workers published by the CDC,  
188 updated on March 7, 2020(CDC, 2020; Giao et al., 2020). The self-  
189 administered questionnaire consisting of socio-demographic  
190 questions, and 35 questions based on knowledge, attitude and  
191 infection control practices related to COVID-19 disease in the  
192 healthcare setting.

193 Information sheet and consent forms was included in the first part  
194 of the questionnaire. The study participants were requested to read  
195 the informed-consent statements before they proceeded to the next  
196 section. Study participants who unwilling to take part in the study  
197 were not forced to proceed with the questions. The questionnaires  
198 were collected daily, checked for completeness and any incomplete  
199 questionnaire the respondent were contacted for completion. In  
200 addition, timely supervision of the data collection process was  
201 done by the investigators. During collection of the questionnaires  
202 precautionary measures such as wearing of masks, physical  
203 distancing was observed.

204

205

206

### 207 **Methods of data analysis**

208 Data was coded and entered into Epi info version 3.5.1 software  
209 and exported into STATA version 14.1 for analysis. Knowledge  
210 and practice questions were scored as 1 or 0 for correct and  
211 incorrect responses, respectively. The total knowledge score varied  
212 between 0 (with no correct answer) and 15 (for all correct  
213 answers), and a cut off level of  $\leq 12$  was considered as poor  
214 knowledge, and  $>12$  indicated good knowledge. The question  
215 regarding the practice was fourteen (with minimum score 14 and  
216 maximum score 42). The score of the practice based on 3 points, in  
217 which the score of 1 to 3 was given from always to never. A mean  
218 score  $>18.8$  (answering for always) was considered as having good  
219 practice and a score of  $\leq 18.5$  indicated a poor practice (answering  
220 never or occasionally).

221 Whereas, attitude responses were provided with 1, 2, 3, 4 or 5 for  
222 “Strongly Agree”, “Agree”, “Neutral”, “Disagree” and “Strongly  
223 Disagree”, respectively. The question regarding the attitude was  
224 six (with minimum score of 6 and maximum score of 30). The  
225 score of the attitude was based on 5 points Likert scale, in which  
226 the score of 1 to 5 was given from strongly disagree to strongly  
227 agree. A mean score  $>10.5$  (answering for strongly agree or agree)  
228 was considered as a favorable attitude and a score of  $\leq 10.5$  was  
229 considered negative attitude (answering strongly disagree or  
230 disagree or neutral).

231 Summary statistics such as frequencies and proportions were  
232 computed as appropriate. Chi square test was used to compare  
233 categorical variables and ratios. T-test and ANOVA were used to



234 analyze the relationship between the dependent (knowledge,  
235 attitude and practice), and independent variables (demographic  
236 characteristics of the participants). Spearman's correlation was  
237 used to assess the relationship between mean knowledge and  
238 attitude scores. All the differences of estimated variables were  
239 considered statistically significant if  $P < 0.05$ .

240

#### 241 **Ethical considerations**

242 Ethical clearance and support letters were obtained from the  
243 Ethical Review Committee (ERC) of the College of Medicine and  
244 Health Sciences, Jigjiga University. The support letter then  
245 submitted to the public health facilities. Then, permission was  
246 obtained from the health facilities director and department/section  
247 heads. Study participants were informed about the purpose and  
248 importance of the study through written informed consent before  
249 the data collection process. In addition, participants who are  
250 unwilling to take part in the study and those who need to quit their  
251 participation at any stage were informed to do so without any  
252 restriction.

253

254

255

256

257

258

259

260 **Result**

261 **Socio-demographic characteristics**

262 A total of 434 health workers completed the survey questionnaire.  
263 Of the 686 HCWs approached, total of 434 HCWs responded  
264 (response rate = 63%). A vast majority of the participants were  
265 male (n = 293, 67.5%), with a mean age of 27.6 (SD: 5.3) years  
266 and below 40 years of age (n = 423, 97.5%). Majority of the  
267 participants were working in Referral Hospital (n = 345, 79.5%).  
268 Three hundred twenty-two (74.2%) participants were nurses, 36  
269 (8.3%) were physician, 31 (7.1%) were laboratory  
270 technician/technologist, 26(6.0%) were pharmacist, 12(2.8%) were  
271 x-ray technicians and 7 (1.6%) were dentist. Of the 434  
272 participants, 307 (70.7%) had more than 5 years' experience. The  
273 main sources of information about COVID-19 among participants  
274 were information from international health organizations like the  
275 CDC and WHO, Ministry of Health, Ethiopia media sites, News  
276 Media and social media such as WhatsApp and Facebook. Table 1  
277 summarizes the sociodemographic characteristics of the  
278 participants.

279

280

281

282

283

284

285

286

287 **Table 1: Sociodemographic characteristics of the participants**

| <b>Variable</b>                          | <b>Frequency<br/>(n)</b> | <b>%</b> |
|------------------------------------------|--------------------------|----------|
| <b>Sex</b>                               |                          |          |
| Male                                     | 293                      | 67.5     |
| Female                                   | 141                      | 32.5     |
| <b>Age (Mean, SD)</b>                    |                          |          |
| 18-39                                    | 423                      | 97.5     |
| >40                                      | 11                       | 2.5      |
| <b>Qualification</b>                     |                          |          |
| Nurse (including midwives)               | 322                      | 74.2     |
| Physician                                | 36                       | 8.3      |
| Pharmacist                               | 26                       | 6.0      |
| Dentist                                  | 7                        | 1.6      |
| Laboratory technologist                  | 31                       | 7.1      |
| X-ray physician                          | 12                       | 2.8      |
| <b>Place of work</b>                     |                          |          |
| Referral hospital                        | 345                      | 79.5     |
| Karamara hospital                        | 33                       | 7.6      |
| Ablele HC                                | 44                       | 10.1     |
| Ayrdage HC                               | 12                       | 2.8      |
| <b>Work experience (Mean, SD)</b>        |                          |          |
| 0-4 years                                | 127                      | 29.3     |
| >5 years                                 | 307                      | 70.7     |
| <b>Source of information on covid-19</b> |                          |          |
| WHO                                      | 241                      | 55.5     |
| Government site and media                | 105                      | 24.2     |
| Social media                             | 52                       | 12.0     |
| Other news media                         | 30                       | 6.9      |
| Other                                    | 6                        | 1.4      |

288

289

290

291 **Knowledge**

292 Almost all HCWs were able to correctly identify COVID-19 key  
293 symptoms. Data from current study revealed that 93% of  
294 respondents fully understood that isolation and treatment of people  
295 who are infected with the COVID-19 virus are effective ways to  
296 reduce the spread of the virus. Almost 90% were also aware of  
297 factors likely to be associated with severity of the disease.

298 Majority of the respondents understood dynamics of COVID-19  
299 infectiousness: 91.5% respondents were aware of  
300 possibilities to infect before the onset of symptoms;  
301 90.8% of HCWs responded true on droplets as a major  
302 transmission route. Considerable proportion of respondents  
303 (93.1%) were informed that the incubation period is not constant  
304 and could vary from 2-14 days.

305

306

307

308

309

310

311

312

313

314

315



318 **Table 2: Knowledge of HCWs toward the COVID-19, 2020**

| Questions                                                                                                                                                              | Response (N=434)   |                     |                            |
|------------------------------------------------------------------------------------------------------------------------------------------------------------------------|--------------------|---------------------|----------------------------|
| <b>Knowledge</b>                                                                                                                                                       | <b>True (n, %)</b> | <b>False (n, %)</b> | <b>I don't know (n, %)</b> |
| The common symptoms of COVID-19 are fever fatigue and dry cough                                                                                                        | 414(95.4)          | 13(3.0)             | 7(1.6)                     |
| The causative agent of COVID-19 is corona virus                                                                                                                        | 410(94.4)          | 12(2.8)             | 12(2.8)                    |
| The incubation period of COVID-19 is 2-14 days                                                                                                                         | 404(93.1)          | 21(4.8)             | 9(2.1)                     |
| Not all persons with COVID-2019 will develop to severe cases. Only those who are elderly, have chronic illnesses are more likely to be severe cases.                   | 390(89.9)          | 33(7.6)             | 11(2.5)                    |
| COVID-19 can be transmitted through direct contact of respiratory droplets when infected persons coughs or sneezes.                                                    | 394(90.8)          | 28(6.4)             | 12(2.8)                    |
| The disease can be transmitted from asymptomatic patient                                                                                                               | 397(91.5)          | 26(6.0)             | 11(2.5)                    |
| Training and observation of standard precautionary measures are required by care-giving personnel in suspected and probable cases of COVID-19 infection                | 392(90.3)          | 30(6.9)             | 12(2.8)                    |
| Visitors to patients with suspected, probable and confirmed cases of COVID-19 infection should be limited both in hospital and at home                                 | 406(93.6)          | 22(5.1)             | 6(1.3)                     |
| The disease can be spread by touching a surface or object that has the virus on it and then touching their own mouth, nose, or possibly their eyes.                    | 401(92.4)          | 22(5.1)             | 11(2.5)                    |
| Isolation and treatment of people who are infected with the COVID-19 virus are effective ways to reduce the spread of the virus.                                       | 404(93.1)          | 23(5.3)             | 7(1.6)                     |
| People who have contact with someone infected with the COVID-19 virus should be immediately isolated in a proper place. In general, the observation period is 14 days. | 400(92.2)          | 24(5.5)             | 10(2.3)                    |

|                                                                                                                                                                                    |           |          |         |
|------------------------------------------------------------------------------------------------------------------------------------------------------------------------------------|-----------|----------|---------|
| A person with mild symptoms of COVID-19 must remain at home until resolution of clinical symptoms                                                                                  | 398(91.7) | 30(6.9)  | 6(1.4)  |
| Standard precautions should be followed by health care providers in dealing with suspected, probable and confirmed cases of COVID-19 infection                                     | 395(91.0) | 29(6.7)  | 10(2.3) |
| Oxygen therapy should be given to all cases of severe COVID-19 with acute respiratory infection                                                                                    | 369(85.0) | 54(12.5) | 11(2.5) |
| Ventilation with an endotracheal tube must be carried out in patient with confirmed and or suspected COVID-19 with clinical manifestations of acute respiratory distress symptoms. | 379(87.3) | 40(9.2)  | 15(3.5) |

319 **Attitude**

320 The mean attitude score 10.5 (SD: 4.1). Overall, there was poor attitude among HCWs toward COVID-  
 321 19. Only 45.2 % (n = 196) of the participants had a good attitude toward COVID-19. Only 48.8% (n =  
 322 212) were confident that COVID-19 can be controlled by public health institute (Table 3). When asked  
 323 about the using mask, up to 49.3% (n = 214) believed that It is imperative to use surgical mask when  
 324 working with patient with COVID-19.

325

326 **Table 3: Attitude of HCWs toward the COVID-19, 2020**

| Questions                                                                            | Response (N=434) |           |         |          |         |
|--------------------------------------------------------------------------------------|------------------|-----------|---------|----------|---------|
|                                                                                      | SA               | A         | N       | D        | SD      |
| Caring for patients with COVID-19 infection may be a threat to health care personnel | 226(52.1)        | 147(33.9) | 28(6.4) | 24(5.5)  | 9(2.1)  |
| Public health agencies like EPHI can control Outbreak of COVID-19                    | 212(48.8)        | 121(27.9) | 42(9.7) | 50(11.5) | 9(2.1)  |
| COVID-19 can have a negative effect on the economies of the countries involved       | 231(53.2)        | 135(31.1) | 24(5.5) | 36(8.3)  | 8(1.9)  |
| It is important to report suspected cases to health authorities                      | 301(69.3)        | 104(24.0) | 11(2.5) | 13(3.0)  | 5(1.2)  |
| COVID-19 is preventable                                                              | 226(52.1)        | 136(31.3) | 33(7.6) | 23(5.3)  | 16(3.7) |
| It is imperative to use surgical mask when working with patient with COVID-19        | 214(49.3)        | 136(31.3) | 23(5.3) | 26(6.0)  | 35(8.1) |



327 **Practice**

328 About practical measures put in place by HCWs in order to protect themselves and their families, 72%  
329 of health care workers reported to always wore personal protective equipment when coming into contact  
330 with the patients and up to 67.5% washed their hands before and after touching each patient. Other  
331 measures included: avoiding going to crowded places and avoiding shaking hands, hugging or  
332 kissing. Unfortunately, as high as 72.6% (n = 315) of the participants had avoided patients with  
333 symptoms suggestive to those of COVID-19 (Table 4).

334

335

336

337

338

339

340

341

342

343

344

345 **Table 4: Practice of HCWs toward the COVID-19, 2020**

| Questions                                                                                           | Response (N=434) |                   |              |
|-----------------------------------------------------------------------------------------------------|------------------|-------------------|--------------|
| Practice                                                                                            | Always (n, %)    | Occasional (n, %) | Never (n, %) |
| I always wear the personal protective equipment when handling a patient                             | 314(72.3)        | 101(23.3)         | 19(4.4)      |
| I wash my hands with water and soap before putting on the gloves                                    | 302(69.6)        | 105(24.2)         | 27(6.2)      |
| For residual protection, I use hand sanitizer after washing hands with soap and water               | 303(69.8)        | 103(23.7)         | 26(6.5)      |
| I wash hand between patients (before and after examining)                                           | 293(67.5)        | 105(24.2)         | 36(8.3)      |
| <br>                                                                                                |                  |                   |              |
| I wash my hands whenever they are soiled                                                            | 298(68.7)        | 113(26.0)         | 23(5.3)      |
| I wash my hands after blowing nose or covering a sneeze                                             | 289(66.6)        | 114(26.3)         | 31(7.1)      |
| I wash my hands with soap and water and apply with hand sanitizer when leaving the health facility  | 208(71.0)        | 107(24.6)         | 19(4.4)      |
| When I sneezing or coughing, I cover my nose or mouth with a tissue/clean cloth or in to my elbow   | 308(71.0)        | 106(24.4)         | 20(4.6)      |
| I keep at list one miter distance from a sick person                                                | 311(71.7)        | 108(24.9)         | 15(3.4)      |
| I avoid shaking hands, hugging or kissing with colleagues/patients                                  | 310(71.4)        | 110(25.4)         | 14(3.2)      |
| I avoid touching my mouth, nose and eyes with my hand if I have not washed them with water and soap | 307(70.7)        | 117(27.0)         | 10(2.3)      |
| I avoid going to crowded places                                                                     | 316(72.8)        | 107(24.7)         | 11(2.5)      |
| I safely dispose the used PPE items when I finish the service                                       | 315(72.6)        | 100(23.0)         | 19(4.4)      |
| I avoid patients with signs and symptoms suggestive of COVID-19.                                    | 315(72.6)        | 91(21.0)          | 28(6.4)      |

346

347 **Comparison of KAP between demographic characteristics of**  
348 **HCWs**

349 Almost ninety percent (n = 381) of the participants scored 12 or  
350 more and were considered to have sufficient knowledge. Of the  
351 total participants, more male participants had sufficient knowledge  
352 than those of female participants (89.8 vs. 83.7%), however this  
353 difference was not statistically significant (p = 0.07). More  
354 participants working at the referral hospital had sufficient  
355 knowledge than other health facilities (p<0.001).

356 Only 45% of the participants had positive attitude (n=196).  
357 Bivariate analysis revealed that more HCWs working at Ayardage  
358 HC had good attitude compared to those HCWs working at other  
359 health facilities (p=0.02). More HCWs who used government  
360 media like television to access information on COVID-19 had  
361 better attitude (p = 0.009). There was no statistically significant  
362 difference between attitude and other sociodemographic variables  
363 (Table 5).

364 Overall, up to 38.5% (n = 167) of the participants had good  
365 practices (mean score  $\geq$  18.8). HCWs  $\leq$ 40 (p=0.04) and those  
366 working at Ayardage HC practiced more than their counter parts (p  
367 <0.001) (Table 5).

368

369

370

371

372

373 **Table 5: Comparison of COVID-19 knowledge, attitude and**  
 374 **practice between different groups**

| Variable                                 | Sufficient<br>Knowledge<br>(n=381) | <i>P</i> <sup>1</sup> | Positive<br>attitude<br>(n=196) | <i>P</i> <sup>1</sup> | Good<br>practice<br>(n=167) | <i>P</i> <sup>1</sup> |
|------------------------------------------|------------------------------------|-----------------------|---------------------------------|-----------------------|-----------------------------|-----------------------|
|                                          | Freq (%)                           |                       | Freq (%)                        |                       | Freq (%)                    |                       |
| Overall                                  | 381(87.8)                          |                       | 196(45.2)                       |                       | 167(38.5)                   |                       |
| <b>Sex</b>                               |                                    |                       |                                 |                       |                             |                       |
| Male                                     | 263(89.8)                          | 0.07                  | 130(44.4)                       | 0.63                  | 110(37.5)                   | 0.56                  |
| Female                                   | 118(83.7)                          |                       | 66(46.8)                        |                       | 57(40.4)                    |                       |
| <b>Age</b>                               |                                    |                       |                                 |                       |                             |                       |
| 18-39                                    | 372(87.9)                          |                       | 190(44.9)                       | 0.52                  | 166(39.2)                   | 0.04                  |
| >40                                      | 9(81.2)                            |                       | 6(54.6)                         |                       | 1(9.1)                      |                       |
| <b>Qualification</b>                     |                                    |                       |                                 |                       |                             |                       |
| Nurse (including midwives)               | 287(89.1)                          | 0.45                  | 137(42.5)                       | 0.44                  | 129(40.1)                   | 0.23                  |
| Physician                                | 29(80.6)                           |                       | 18(50.0)                        |                       | 17(47.2)                    |                       |
| Pharmacist                               | 23(88.5)                           |                       | 14(53.9)                        |                       | 5(19.2)                     |                       |
| Dentist                                  | 5(71.4)                            |                       | 4(57.1)                         |                       | 3(42.9)                     |                       |
| Laboratory technologist                  | 26(83.9)                           |                       | 15(48.4)                        |                       | 9(29.0)                     |                       |
| X-ray physician                          | 11(91.0)                           |                       | 8(66.7)                         |                       | 4(33.3)                     |                       |
| <b>Place of work</b>                     |                                    |                       |                                 |                       |                             |                       |
| Referral hospital                        | 317(91.9)                          | <0.001                | 140(40.6)                       | 0.02                  | 129(37.4)                   | 0.001                 |
| Karamara hospital                        | 23(69.7)                           |                       | 20(60.6)                        |                       | 10(30.3)                    |                       |
| Ablele HC                                | 32(72.7)                           |                       | 27(61.4)                        |                       | 27(61.4)                    |                       |
| Ayrdage HC                               | 9(75.0)                            |                       | 9(75.0)                         |                       | 1 (8.30)                    |                       |
| <b>Work experience</b>                   |                                    |                       |                                 |                       |                             |                       |
| 0-4 years                                | 113(89.0)                          | 0.62                  | 53(41.7)                        | 0.36                  | 51(40.2)                    | 0.64                  |
| >5 years                                 | 268(87.8)                          |                       | 143(46.6)                       |                       | 116(37.8)                   |                       |
| <b>Source of information on covid-19</b> |                                    |                       |                                 |                       |                             |                       |
| WHO                                      | 213 (88.4)                         | 0.28                  | 100(41.5)                       | 0.009                 | 142(40.7)                   | 0.17                  |
| Government site and media                | 95(90.5)                           |                       | 61(58.1)                        |                       | 74(28.6)                    |                       |
| Social media                             | 45(86.4)                           |                       | 16(30.8)                        |                       | 27(46.2)                    |                       |

|                  |          |          |          |
|------------------|----------|----------|----------|
| Other news media | 24(80.0) | 16(53.3) | 18(40.0) |
| Other            | 4(66.7)  | 3(50.0)  | 3(50.0)  |

---

375 | Pearson chi-squared test to compare KAP between demographic  
376 | characteristics of HCWs

377

378

379 | **Distribution of KAP**

380 | The mean knowledge, attitude and practice score was 13.7 (SD:  
381 | 2.6), 10.5 (SD:4.1) and 18.8 (SD:5.8) respectively. Male  
382 | participants had higher knowledge score than female (p=0.013).  
383 | Similarly, nurses had higher knowledge score compared to other  
384 | health professionals (p=0.04). The level of knowledge among the  
385 | healthcare workers working at Referral hospital (p<0.001) and  
386 | those who seek covid-19 related information from world health  
387 | organization (p<0.001). (Table 6).

388 | Attitude score was higher among health workers working at Ablele  
389 | HC and among HCWs who seek information from other sources.

390 | Likewise, practice score was higher among younger professional  
391 | (p=0.04), those working at Ablele hospital (p=0.01) and those who  
392 | seek covid-19 information from other sources (p=0.02). (Table 6

394 **Table 6: Distribution of knowledge and attitude scores among healthcare workers, 2020**

| <b>Variable</b>            | <b>Knowledge<br/>(Max=15)</b> | <i>t-value</i> | <i>F-value</i> | <i>P-value</i> | <b>Attitude<br/>(Max=30)</b> | <i>t-value</i> | <i>F-value</i> | <i>P-value</i> | <b>Practice<br/>(Max=42)</b> | <i>t-value</i> | <i>F-value</i> | <i>P-value</i> |
|----------------------------|-------------------------------|----------------|----------------|----------------|------------------------------|----------------|----------------|----------------|------------------------------|----------------|----------------|----------------|
|                            | Mean ± SD                     |                |                |                | Mean ± SD                    |                |                |                | Mean ± SD                    |                |                |                |
| Overall                    | 13.7 ± 2.6                    |                |                |                | 10.5 ± 4.1                   |                |                |                | 18.8 ± 5.8                   |                |                |                |
| <b>Sex</b>                 |                               |                |                |                |                              |                |                |                |                              |                |                |                |
| Male                       | 13.9 ± 2.3                    | 2.49           | -              | 0.013*         | 10.3 ± 4.1                   | -1.02          | -              | 0.31           | 18.6 ± 5.8                   | -1.18          | -              | 0.24           |
| Female                     | 13.3 ± 3.1                    |                |                |                | 10.8 ± 4.1                   |                |                |                | 19.3 ± 6.3                   |                |                |                |
| <b>Age</b>                 |                               |                |                |                |                              |                |                |                |                              |                |                |                |
| 18-39                      | 13.7 ± 2.6                    | 0.014          | -              | 0.99           | 10.5 ± 4.1                   | 0.24           | -              | 0.81           | 18.9 ± 6.0                   | 2.01           | -              | 0.04*          |
| >40                        | 13.7 ± 1.8                    |                |                |                | 10.2 ± 2.9                   |                |                |                | 15.3 ± 2.7                   |                |                |                |
| <b>Qualification</b>       |                               |                |                |                |                              |                |                |                |                              |                |                |                |
| Nurse (including midwives) | 13.9 ± 2.2                    | -              | 2.39           | 0.04*          | 10.3 ± 3.8                   | -              | 1.45           | 0.21           | 19.2 ± 6.1                   | -              | 1.61           | 0.16           |
| Physician                  | 12.9 ± 3.9                    |                |                |                | 11.0 ± 4.4                   |                |                |                | 19.3 ± 5.9                   |                |                |                |
| Pharmacist                 | 13.2 ± 2.4                    |                |                |                | 10.7 ± 3.8                   |                |                |                | 16.5 ± 3.5                   |                |                |                |
| Dentist                    | 12.2 ± 3.5                    |                |                |                | 9.9 ± 2.3                    |                |                |                | 18.3 ± 4.5                   |                |                |                |
| Laboratory technologist    | 13.0 ± 3.5                    |                |                |                | 10.9 ± 5.6                   |                |                |                | 17.3 ± 5.9                   |                |                |                |
| X-ray physician            | 13.6 ± 3.1                    |                |                |                | 13.2 ± 6.7                   |                |                |                | 17.4 ± 4.4                   |                |                |                |
| <b>Place of work</b>       |                               |                |                |                |                              |                |                |                |                              |                |                |                |
| Referral hospital          | 14.3 ± 1.8                    | -              | 40.5           | <0.001**       | 10.1 ± 4.1                   | -              | 5.93           | <0.01*         | 18.8 ± 6.0                   | -              | 3.87           | 0.01*          |
| Karamara hospital          | 12.3 ± 3.4                    |                |                |                | 12.0 ± 4.2                   |                |                |                | 17.6 ± 4.4                   |                |                |                |
| Ablele HC                  | 10.6 ± 4.0                    |                |                |                | 12.3 ± 3.8                   |                |                |                | 20.9 ± 6.6                   |                |                |                |

|                                          |            |      |      |       |            |       |      |       |             |      |      |       |
|------------------------------------------|------------|------|------|-------|------------|-------|------|-------|-------------|------|------|-------|
| Ayrdage HC                               | 12.6 ± 2.4 |      |      |       | 11.5 ± 2.4 |       |      |       | 15.3 ± 1.8  |      |      |       |
| <b>Work experience</b>                   |            |      |      |       |            |       |      |       |             |      |      |       |
| 0-4 years                                | 13.8 ± 2.3 | 0.41 | -    | 0.68  | 9.9 ± 3.4  | -1.78 | -    | 0.08  | 18.9 ± 6.0  | 0.54 | -    | 0.59  |
| >5 years                                 | 13.7 ± 2.7 |      |      |       | 10.7 ± 4.4 |       |      |       | 15.3 ± 2.7  |      |      |       |
| <b>Source of information on covid-19</b> |            |      |      |       |            |       |      |       |             |      |      |       |
| WHO                                      | 14.0 ± 2.0 | -    | 5.94 | <0.01 | 10.4 ± 3.9 | -     | 2.96 | 0.02* | 19.2 ± 6.1  | -    | 2.88 | 0.02* |
| Government site and media                | 13.9 ± 2.2 |      |      |       | 11.1 ± 4.4 |       |      |       | 17.2 ± 4.5  |      |      |       |
| Social media                             | 13.3 ± 3.1 |      |      |       | 9.1 ± 3.3  |       |      |       | 19.1 ± 6.1  |      |      |       |
| Other news media                         | 12.6 ± 3.9 |      |      |       | 11.6 ± 4.4 |       |      |       | 19.7 ± 7.0  |      |      |       |
| Other                                    | 9.8 ± 6.9  |      |      |       | 12.2 ± 7.0 |       |      |       | 22.2 ± 11.2 |      |      |       |

395 Data were expressed as mean ± SD. *t*-test and ANOVA to compare the score between KAP between demographic  
396 characteristics of HCWs. \* p<0.05, \*\*P<0.01

397 **Correlation between knowledge, attitude and practice**

398 Table 5 presents the correlation coefficient between whole grains  
399 knowledge, attitude and practice. It was found that attitude and  
400 practice domain were inversely associated knowledge score ( $r=-$   
401  $0.295$ ,  $p < 0.01$ ) and ( $r=-0.298$ ,  $p < 0.01$ ) for attituded and practice  
402 respectively. Significant positive correlations were found between  
403 attitude with attitude ( $r=0.173$ ,  $p < 0.0003$ ).

404 **Table 6: Correlation between knowledge, attituded and**  
405 **practice**

|           | Knowledge | Attitude | Practice |
|-----------|-----------|----------|----------|
| Knowledge | -         |          |          |
| Attitude  | -0.295**  |          |          |
| Practice  | -0.298**  | 0.173*   |          |

406 \*\*\* significant at level of  $< 0.001$ , \*\* significant at level  $< 0.05$



## 407 **Discussion**

408 The current work assessed the knowledge, attitude and practice  
409 toward the COVID-19 outbreaks among HCWs working at public  
410 health facilities. In this study, the socio-demographic, knowledge  
411 level, attitude, and infection prevention practical level response of  
412 434 HCWs were analyzed.

413 Our study found that most of the HCWs were well informed with  
414 COVID-19 related knowledge, during the outbreak. Among these  
415 HCWs, the level of knowledge about COVID-19 was higher male  
416 participants and nurse. From our study, 87.8% of HCW had  
417 sufficient knowledge about COVID-19 which is higher than values  
418 reported by studies conducted in Uganda and Northern  
419 Ethiopia(Olum et al., 2020; Tadesse et al., 2020) where 69% and  
420 74% of HCWs had sufficient knowledge. The proportion of HCW  
421 with sufficient knowledge in the current study is similar to those  
422 studies conducted in China(Huynh et al., 2020; Zhou et al., 2020).

423 In our study, most of the participants used information from  
424 international and governmental media (websites and verified social  
425 media pages). Our study suggests that majority of HCWs with  
426 sufficient knowledge on COVID-19 used news media such  
427 television. This suggests that such media should be frequently used  
428 to disseminate information on COVID-19 by the stakeholders  
429 involved in covid-19 response.

430 About 52% of HCW believed that caring for COVID-19 patients  
431 may be a threat to health care workers which is similar to findings  
432 by study conducted in China(Zhou et al., 2020) which showed  
433 around 85% of the surveyed HCWs were afraid of getting infected  
434 while caring for their patients. HCWs help patients during their  
435 routine tasks such as patient consultation, infusion, dressing  
436 changes and surgery. They must also deal with many other

437 emergency situations, and they may become infected with the virus  
438 if they are not cautious.

439 About 14% of HCW believed that wearing general medical masks  
440 may not protect the spread COVID-19 contrary to findings by Ng  
441 et al. which showed adequate protection(Ng et al., 2020).

442 Our study reveals that majority of HCWs have a negative attitude  
443 toward COVID-19 which is in congruence with a KAPs study on  
444 COVID in Uganda among HCWs(Olum et al., 2020) but in  
445 contrast to study in China on COVID-19 and Ethiopia (Jemal et  
446 al., 2020; Zhou et al., 2020). However, Spearman's analysis found  
447 that a significant negative correlation between the mean knowledge  
448 and attitude scores of HCWs about COVID-19 ( $r=-0.295$ ,  $P<0.001$ )  
449 which is in consistent with a study conducted in Vietnam(Huynh et  
450 al., 2020). In other words, the lower the attitude scores were, the  
451 higher the probability of positive attitudes; while the higher the  
452 knowledge scores were, the higher the probability of good  
453 knowledge. Therefore, a good knowledge COVID-19 was directly  
454 associated with a positive attitude.

455 Our study shows that majority of HCWs have low score of  
456 COVID-19 prevention practices contrary to findings by other  
457 studies on coronaviruses(Olum et al., 2020; Tadesse et al., 2020;  
458 Zhou et al., 2020). Though majority of the HCWs are following  
459 key infection prevention and control practices recommended by the  
460 Ministry of Health Ethiopia and WHO. These include regular hand  
461 hygiene, social distancing and wearing personal protective  
462 equipment when in high risk situations. Seventy two percent and  
463 67.5% of HCWs reported wearing personal protective equipment  
464 when in contact with patients and washing hands before/after  
465 handling patients. These are very vital practices to prevent transfer  
466 of COVID-19 from patients to patients and to the HCWs

467 themselves. However, up to 73% of HCWs admitted having  
468 avoided patients with symptoms suggestive of COVID-19. This  
469 can be attributed to shortage of personal protective equipment  
470 globally (Bauchner et al., 2020; Ranney et al., 2020).

471 Our study has some limitations. Firstly, no standardized tool for  
472 assessing KAPs on COVID-19 has been previously validated. We  
473 have however adapted and modified a previously published tool for  
474 assessment of KAP toward prevention of respiratory tract  
475 infections. Secondly, only HCWs in public health facilities in parts  
476 of Somali region were surveyed and the results of this study may  
477 not reflect the KAPs of HCWs in the private sectors. A similar  
478 study may be extended to the community.

479 In conclusion, we found that more than 85% of HCWs have  
480 sufficient knowledge on the transmission, diagnosis and prevention  
481 of the transmission of COVID-19. Knowledge on COVID-19 was  
482 significantly higher among HCWs who are working at referral  
483 hospital. There was statistically significant difference in the level  
484 of knowledge about COVID19 among health care workers. About  
485 55% of the respondents had poor attitude toward COVID-19 and  
486 just over 38% of the HCWs had good practices toward COVID-19  
487 especially those younger than 40 years. In nutshell, the overall  
488 level of knowledge was good. However, the attitude and practice  
489 were relatively low. We therefore, recommend strategies for  
490 enhancing the capacity of healthcare workers to develop positive  
491 attitude and practice.

492

493

494

495

496 **List of abbreviation**

497

498 CDC: Centre of Disease Control

499 CI: Confidence Interval

500 EOC: Emergency Operating Centre

501 EPHI: Ethiopia Public Health Institute

502 ERC: Ethical Review Committee

503 HCW: Health Care Worker

504 IPC: Infection Prevention Control

505 PPE: Personal Protective Equipment

506 WHO: World Health Organization

507

508 **Declarations**

509 **Acknowledgment**

510 We would like to extend a special thanks to Jigjiga University for  
511 funding researches on covid-19 which may be used in planning  
512 health programs about the emerging viral disease.

513 **Funding**

514 This research was funded by Jigjiga University

515

516 **Availability of data and materials**

517 The dataset for this study is available from the corresponding  
518 author on reasonable request.

519 **Ethical approval**

520 Ethical clearance and support letters were obtained from the  
521 Ethical Review Committee (ERC) of the College of Medicine and  
522 Health Sciences, Jigjiga University. The support letter then  
523 submitted to the five public health facilities. Then, permission  
524 obtained from the health facilities director and department/section  
525 heads. Study participants were informed about the purpose and  
526 importance of the study through written informed consent before  
527 the data collection process. In addition, participants who are  
528 unwilling to take part in the study and those who need to quit their  
529 participation at any stage were informed to do so without any  
530 restriction.

531 **Consent for publication**

532 Not applicable

533

534 **Conflict of interest:**

535 The authors declare that they have no competing of interest.

536 **Authorship:**

537 AM conceived the study, prepared the proposal, analyzed the data,  
538 interpreted the findings and wrote the manuscript. TY, MO, MA,  
539 OM, MA and AB were involved in developing the study proposal,  
540 data analysis and reviewing the manuscript.

541

542

543

544

545

## 546 **References**

- 547 Bauchner, H., Fontanarosa, P. B., & Livingston, E. H. (2020).  
548 Conserving supply of personal protective equipment—a  
549 call for ideas. *Jama*, 323(19), 1911-1911.
- 550 Cascella, M., Rajnik, M., Cuomo, A., Dulebohn, S. C., & Di  
551 Napoli, R. (2020). Features, evaluation and treatment  
552 coronavirus (COVID-19) (*StatPearls [Internet]*). StatPearls  
553 Publishing.
- 554 CDC. (2020). *Information for health care professionals* Retrieved  
555 April 15, 2020 from  
556 [https://www.cdc.gov/coronavirus/2019-](https://www.cdc.gov/coronavirus/2019-ncov/hcp/index.html)  
557 [ncov/hcp/index.html](https://www.cdc.gov/coronavirus/2019-ncov/hcp/index.html)
- 558 Chen, N., Zhou, M., Dong, X., Qu, J., Gong, F., Han, Y., Qiu, Y.,  
559 Wang, J., Liu, Y., & Wei, Y. (2020). Epidemiological and  
560 clinical characteristics of 99 cases of 2019 novel  
561 coronavirus pneumonia in Wuhan, China: a descriptive  
562 study. *The lancet*, 395(10223), 507-513.
- 563 Control, C. f. D., & Prevention. (2019). Novel coronavirus,  
564 Wuhan. *China. Information for Healthcare Professionals*.  
565 [https://www.cdc.gov/coronavirus/2019-nCoV/hcp/index.](https://www.cdc.gov/coronavirus/2019-nCoV/hcp/index.html)  
566 [html](https://www.cdc.gov/coronavirus/2019-nCoV/hcp/index.html) (Accessed on February 14, 2020).
- 567 EPHI. (2020). Notification Note on COVID-19 Situational Update.
- 568 Giao, H., Han, N. T. N., Van Khanh, T., Ngan, V. K., Van Tam,  
569 V., & Le An, P. (2020). Knowledge and attitude toward  
570 COVID-19 among healthcare workers at District 2  
571 Hospital, Ho Chi Minh City. *Asian Pacific Journal of*  
572 *Tropical Medicine*, 13.
- 573 Hoffman, S. J., & Silverberg, S. L. (2018). Delays in global  
574 disease outbreak responses: lessons from H1N1, Ebola, and  
575 Zika. *American journal of public health*, 108(3), 329-333.
- 576 Huang, C., Wang, Y., Li, X., Ren, L., Zhao, J., Hu, Y., Zhang, L.,  
577 Fan, G., Xu, J., & Gu, X. (2020). Clinical features of  
578 patients infected with 2019 novel coronavirus in Wuhan,  
579 China. *The lancet*, 395(10223), 497-506.
- 580 Huynh, G., Nguyen, T. N. H., Vo, K. N., & Pham, L. A. (2020).  
581 Knowledge and attitude toward COVID-19 among  
582 healthcare workers at District 2 Hospital, Ho Chi Minh  
583 City. *Asian Pacific Journal of Tropical Medicine*, 13(6),  
584 260.
- 585 Jemal, B., Ferede, Z. A., Mola, S., Hailu, S., Abiy, S., Wolde, G.  
586 D., Tilahun, A., Tesfaye, B., Lemma, D. T., & Alimaw, A.  
587 A. (2020). Knowledge, attitude and practice of healthcare  
588 workers towards COVID-19 and its prevention in Ethiopia:  
589 a multicenter study.
- 590 Li, T., Wei, C., Li, W., Hongwei, F., & Shi, J. (2020). Beijing  
591 Union Medical College Hospital on " pneumonia of novel

- 592 coronavirus infection" diagnosis and treatment proposal  
593 (V2. 0). *Med J Peking Union Med Coll Hosp.*
- 594 McCloskey, B., & Heymann, D. L. (2020). SARS to novel  
595 coronavirus—old lessons and new lessons. *Epidemiology &*  
596 *Infection, 148.*
- 597 Ng, K., Poon, B. H., Kiat Puar, T. H., Shan Quah, J. L., Loh, W. J.,  
598 Wong, Y. J., Tan, T. Y., & Raghuram, J. (2020). COVID-  
599 19 and the risk to health care workers: a case report. *Annals*  
600 *of internal medicine.*
- 601 Novel, C. P. E. R. E. (2020). The epidemiological characteristics  
602 of an outbreak of 2019 novel coronavirus diseases  
603 (COVID-19) in China. *Zhonghua liu xing bing xue za zhi=*  
604 *Zhonghua liuxingbingxue zazhi, 41(2), 145.*
- 605 Olum, R., Chekwech, G., Wekha, G., Nassozi, D. R., & Bongomin,  
606 F. (2020). Coronavirus Disease-2019: Knowledge,  
607 Attitude, and Practices of Health Care Workers at Makerere  
608 University Teaching Hospitals, Uganda. *Frontiers in Public*  
609 *Health, 8, 181.*
- 610 Organization, W. H. (2005). Statement on the second meeting of  
611 the International Health Regulations (2005) Emergency  
612 Committee regarding the outbreak of novel coronavirus  
613 (2019-nCoV).
- 614 Organization, W. H. (2020a). *Advice on the use of masks in the*  
615 *community, during home care and in healthcare settings in*  
616 *the context of the novel coronavirus ( 2019-nCoV)*  
617 *outbreak: interim guidance, 29 January 2020 (*
- 618 Organization, W. H. (2020b). Coronavirus disease 2019 (COVID-  
619 19): situation report, 72.
- 620 Organization, W. H. (2020c). Infection prevention and control  
621 during health care when novel coronavirus ( nCoV)  
622 infection is suspected: interim guidance, 25 January 2020.
- 623 Organization, W. H. (2020d). WHO director-general's opening  
624 remarks at the media briefing on covid-19-11 march 2020.  
625 2020.
- 626 Poole, D. N., Escudero, D. J., Gostin, L. O., Leblang, D., & Talbot,  
627 E. A. (2020). Responding to the COVID-19 pandemic in  
628 complex humanitarian crises. *International Journal for*  
629 *Equity in Health, 19(1), 1-2.*
- 630 Ranney, M. L., Griffeth, V., & Jha, A. K. (2020). Critical supply  
631 shortages—the need for ventilators and personal protective  
632 equipment during the Covid-19 pandemic. *New England*  
633 *Journal of Medicine, 382(18), e41.*
- 634 Selvaraj, S. A., Lee, K. E., Harrell, M., Ivanov, I., & Allegranzi, B.  
635 (2018). Infection rates and risk factors for infection among  
636 health workers during Ebola and Marburg virus outbreaks:

637 a systematic review. *The Journal of infectious diseases*,  
638 218(suppl\_5), S679-S689.  
639 Tadesse, D. B., Gebrewahd, G. T., & Demoz, G. T. (2020).  
640 Knowledge, Attitude, Practice and Psychological response  
641 toward COVID-19 among Nurses during the COVID-19  
642 outbreak in Northern Ethiopia, 2020.  
643 Zhou, M., Tang, F., Wang, Y., Nie, H., Zhang, L., You, G., &  
644 Zhang, M. (2020). Knowledge, attitude and practice  
645 regarding COVID-19 among health care workers in Henan,  
646 China. *Journal of Hospital Infection*.  
647



648

649

650

651

652

653

654

655

656

657

658

659

660

661



663

664

665

666

667

668

669

670

671

672

673

674

675

676

677

678

679

680

681

682

683

684

685

686

687

688

689



691

692

693
